# Supplementary material
Source: MDPI journal article supplement (https://www.mdpi.com/2077-0472/13/2/404)

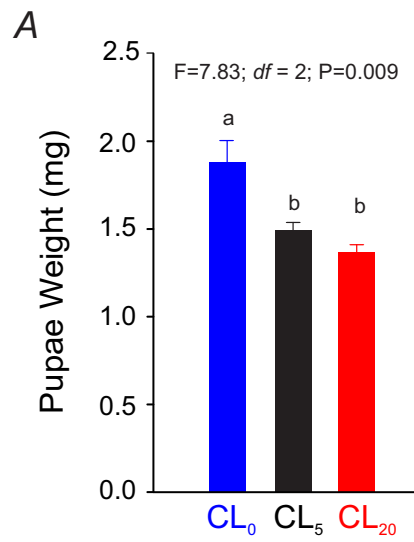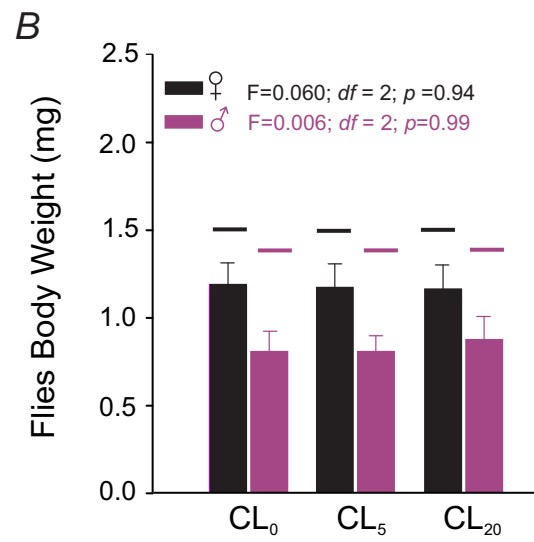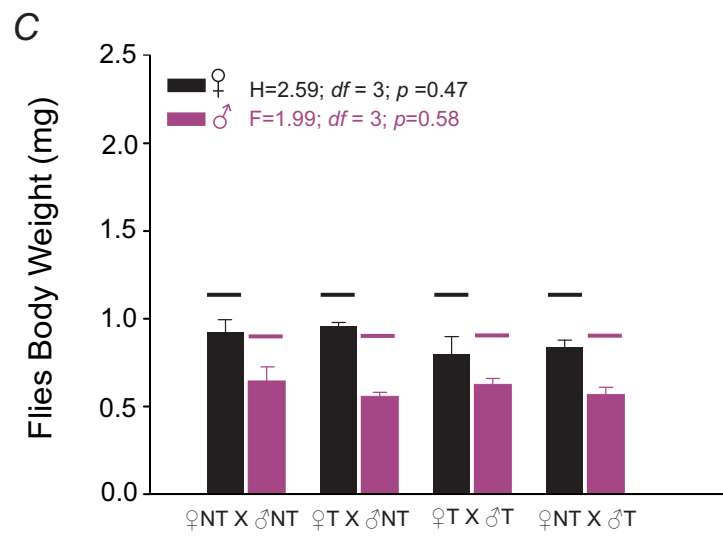

Supplement: s1 [file s1]
